# Supplementary material
Source: Springer Nature journal article supplement (https://www.springermedizin.de/resource/supplementary/12985_2008_509_MOESM7_ESM.pdf/9607908)

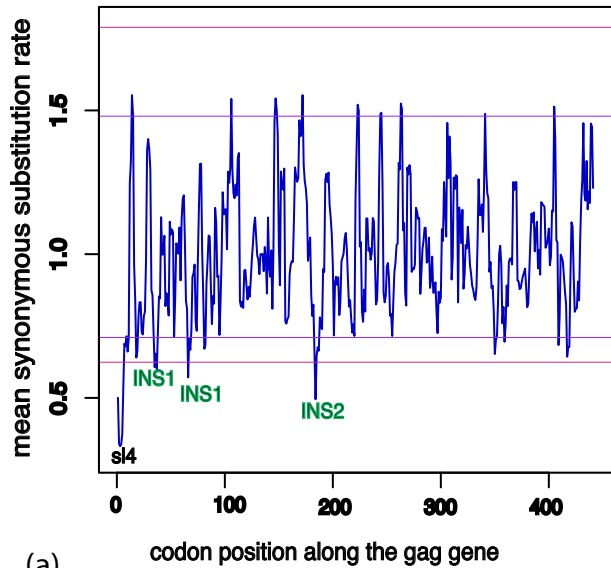

(a)

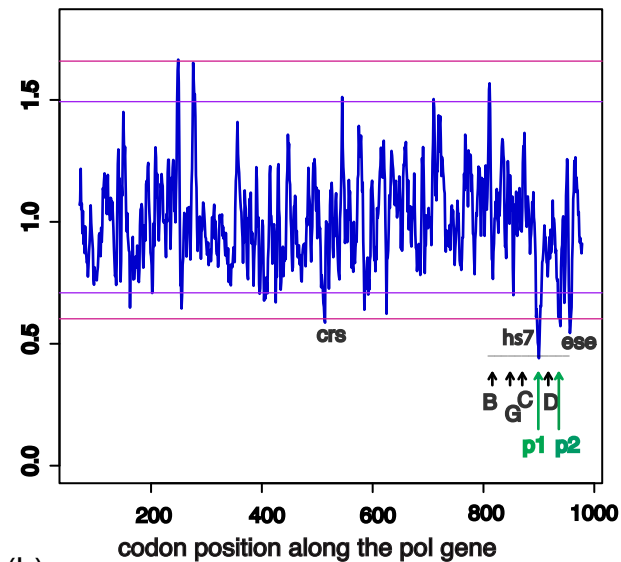

(b)

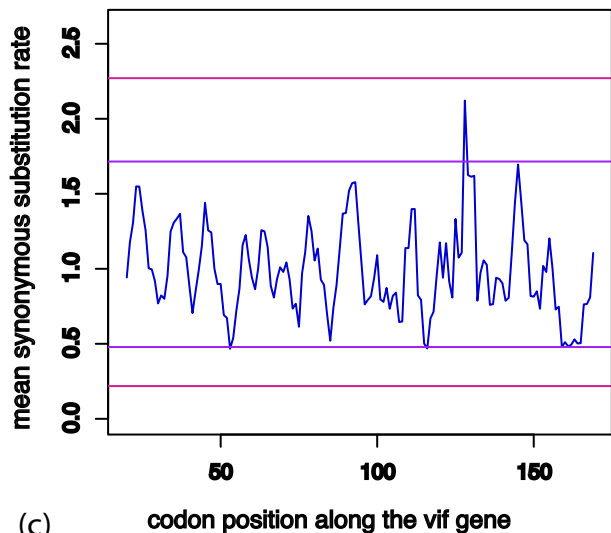

(c)

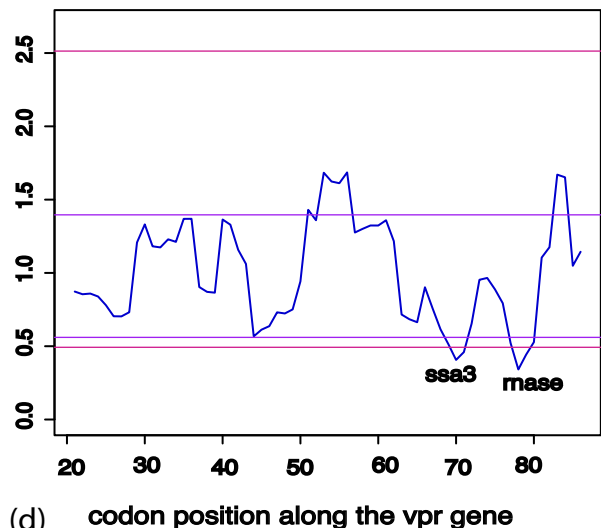

(d)

Supplement: MOESM7 [file 9607908]
